# Supplementary material for: Lect2 deficiency is characterised by altered cytokine levels and promotion of intestinal tumourigenesis
Source: PubMed Central journal article supplement (PMC6284865; doi:10.18632/oncotarget.26335), 2018-11-23
Supplement: oncotarget-09-36430-s001.pdf [file oncotarget-09-36430-s001.pdf]

## Lect2 deficiency is characterised by altered cytokine levels and promotion of intestinal tumourigenesis

### SUPPLEMENTARY MATERIALS

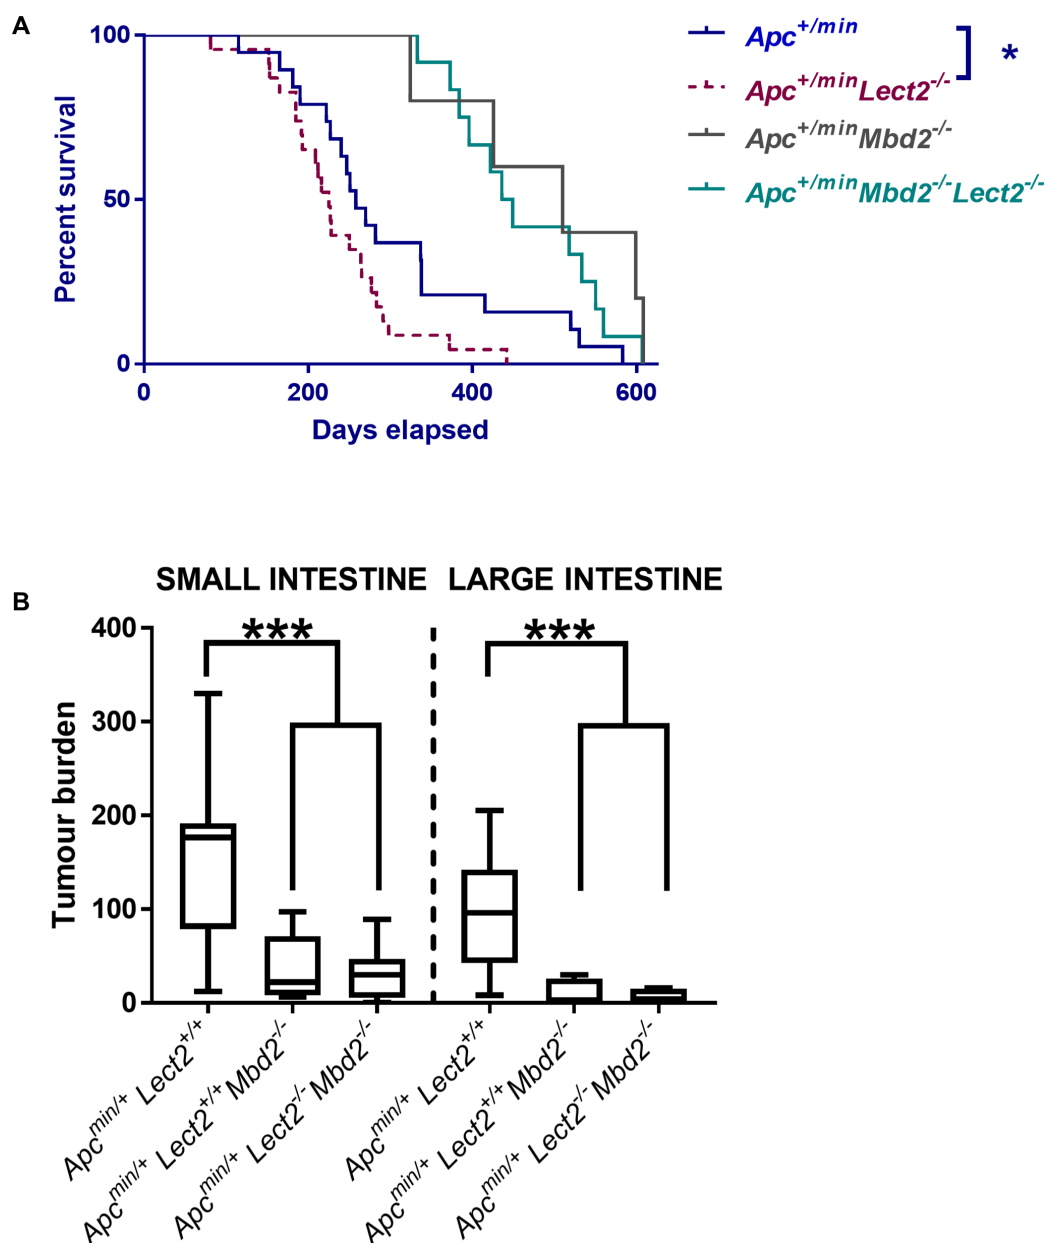

**Supplementary Figure 1: The intestinal tumour resistant  $Apc^{Min/+}Mbd2^{-/-}$  mice are unaffected by the additional loss of Lect2.** Survival curve indicating no difference in lifespan (A) or tumour burden (B) at death between  $Apc^{Min/+}Mbd2^{-/-}$  ( $N = 6$ ) and  $Apc^{Min/+}Mbd2^{-/-}Lect2^{-/-}$  ( $N = 14$ ) mice (\*\*\*)Mann-Whitney  $P < 0.001$ ).

**A**

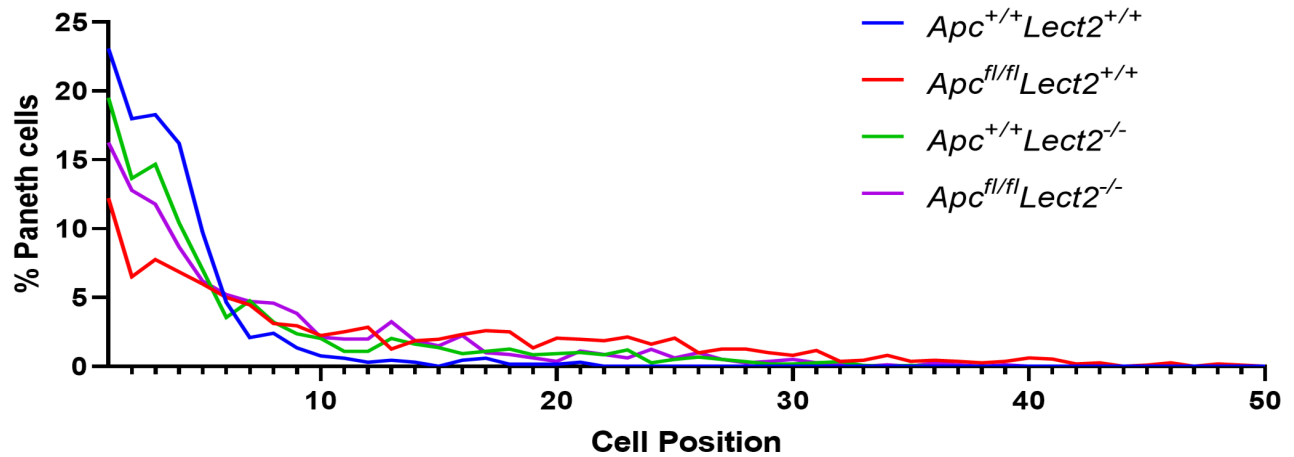

**Supplementary Figure 2: No effect of *Lect2* deficiency on Paneth cell position in the Wnt activated intestine.** *Lect2* deficiency doesn't alter Paneth cell localization (A) in the normal or *Apc* deficient small intestine

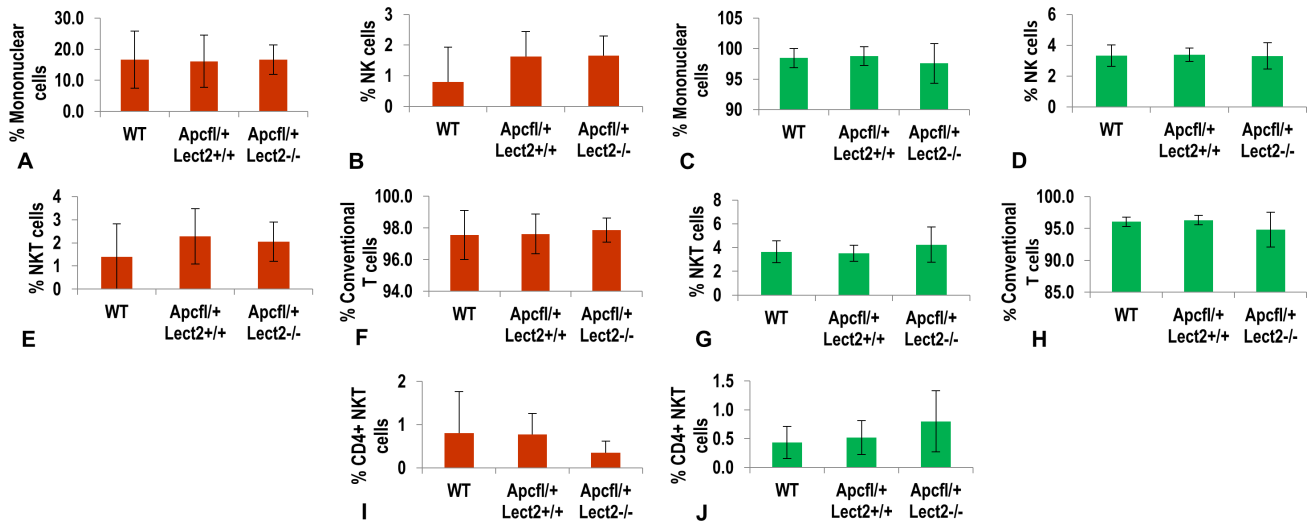

**Supplementary Figure 3: Analysis of lymphocyte populations in *Lect2* deficient mice.** Flow cytometry analysis indicated no alteration to the populations of cells indicated due to the loss of *Lect2* in *Apc*<sup>fl/fl</sup> intestine at 55 d.p.i.. Panel indicating cells as a percentage of total leukocytes from liver (red columns) and spleen (green columns) for mononuclear (A and C), natural killer (NK; B and D), natural killer T cells (NKT; E and G), conventional T cells (F and H) and CD4+NKT cells (I and J).
